# Supplementary material for: Modelling Duchenne muscular dystrophy in MYOD1-converted urine-derived cells treated with 3-deazaneplanocin A hydrochloride
Source: Sci Rep. 2019 Mar 7;9:3807. doi: 10.1038/s41598-019-40421-z (PMC6405839; doi:10.1038/s41598-019-40421-z)
Supplement: Supplementary file 1 — Supplementary Dataset 1 [file 41598_2019_40421_MOESM1_ESM.pdf]

## **Modelling Duchenne muscular dystrophy in *MYOD1*-converted urine-derived cells treated with 3-deazaneplanocin A hydrochloride**

Hotake Takizawa<sup>1,5</sup>, Yuko Hara<sup>1</sup>, Yoshitaka Mizobe<sup>1</sup>, Taisuke Ohno<sup>1</sup>, Sadafumi Suzuki<sup>2</sup>, Ken Inoue<sup>2</sup>, Eri Takeshita<sup>3</sup>, Yuko Shimizu-Motohashi<sup>3</sup>, Akihiko Ishiyama<sup>3</sup>, Mikio Hoshino<sup>4,5</sup>, Hirofumi Komaki<sup>3</sup>, Shin'ichi Takeda<sup>1</sup>, Yoshitsugu Aoki<sup>1,5\*</sup>

1 Department of Molecular Therapy, National Institute of Neuroscience, National Center of Neurology and Psychiatry, Tokyo, Japan.

2 Department of Mental Retardation and Birth Defect Research, National Institute of Neuroscience, National Center of Neurology and Psychiatry, Tokyo, Japan.

3 Department of Child Neurology, National Center Hospital, National Center of Neurology and Psychiatry, Tokyo, Japan.

4 Department of Biochemistry & Cellular Biology, National Institute of Neuroscience, National Center of Neurology and Psychiatry, Tokyo, Japan.

5 Department of NCNP Brain Physiology and Pathology, Graduate School of Medical and Dental Sciences, Tokyo Medical and Dental University, Tokyo, Japan.

\* To whom correspondence should be addressed: Yoshitsugu Aoki. Tel: [+81-42-346-1720]; Fax: [+81-42- 346-1750]; Email: [[tsugu56@ncnp.go.jp](mailto:tsugu56@ncnp.go.jp)]

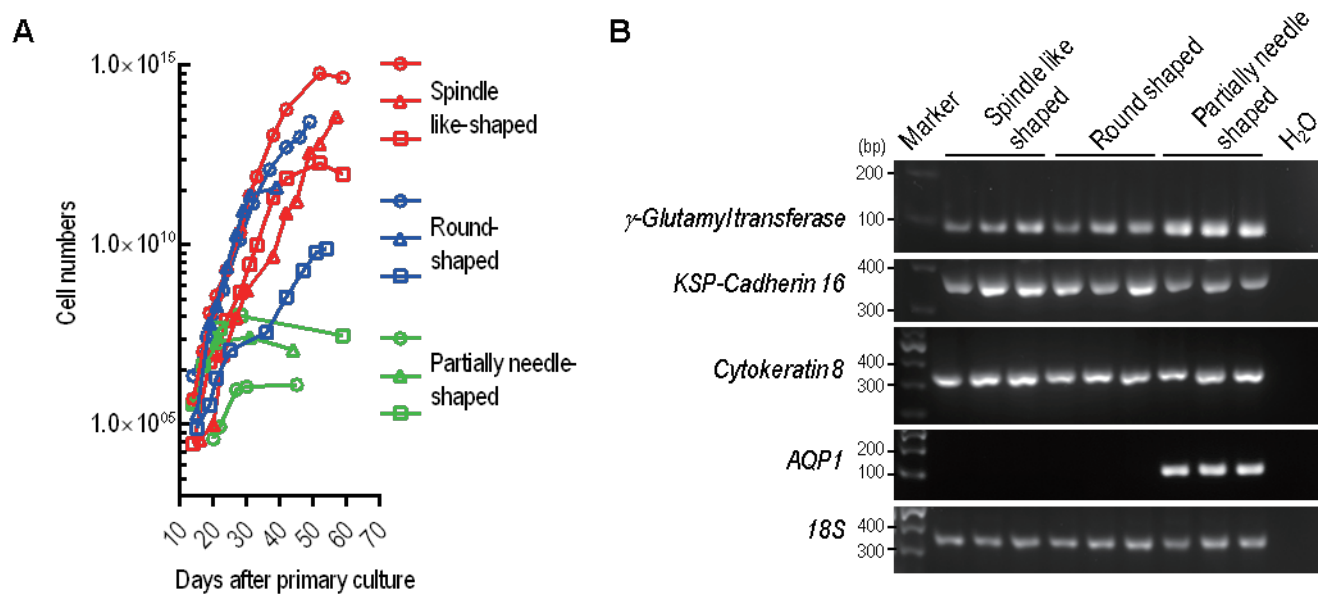

**Supplementary Figure S1. Characteristics of urine-derived cells (UDCs).** (A) Cell proliferation curves of UDCs with the three morphologies. (B) mRNA expression in UDCs with the three morphologies (three colonies each), as detected by RT-PCR targeting renal-specific genes.

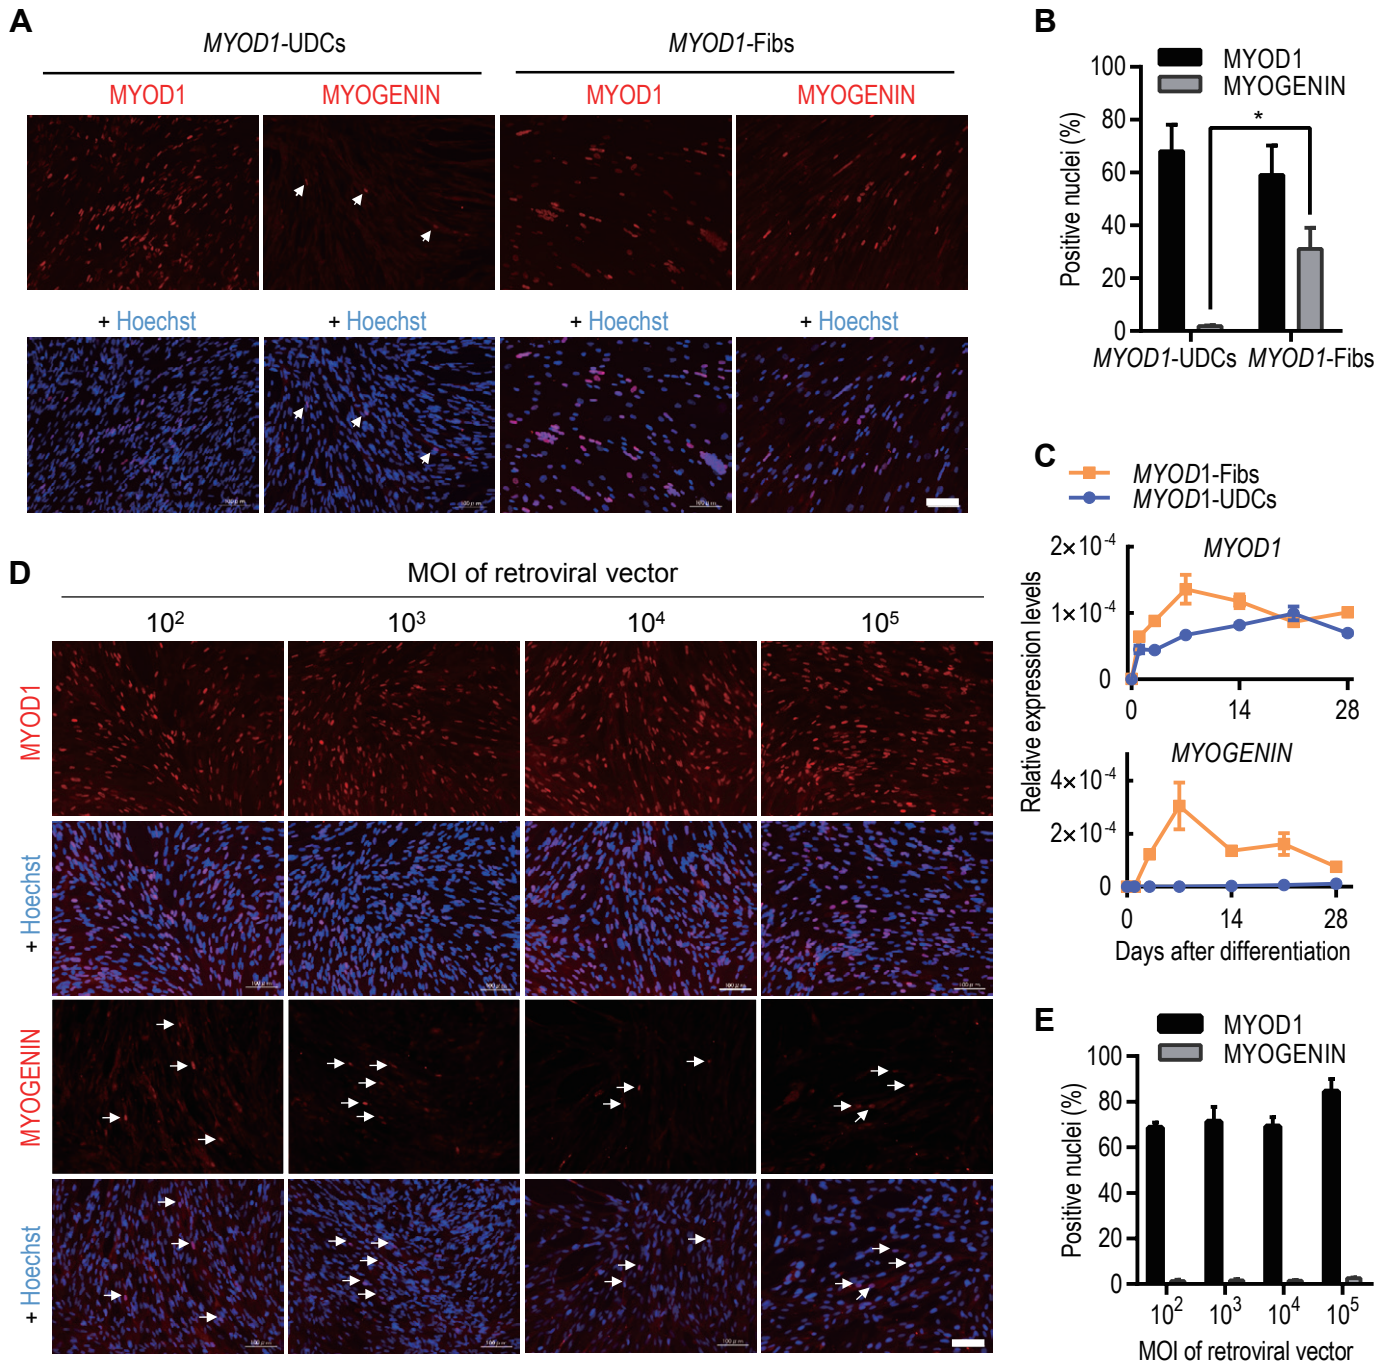

**Supplementary Figure S2. Expression levels of *MYOD1* and *MYOGENIN* in *MYOD1*-converted urine-derived cells (UDCs) and *MYOD1*-converted fibroblasts.** (A) Immunocytochemistry on *MYOD1*-UDCs and *MYOD1*-Fibs 2 weeks after differentiation. Representative images are shown. Arrows show *MYOGENIN*-positive nuclei in *MYOD1*-UDCs. Scale bar: 100  $\mu$ m. (B) The percentage of *MYOD1*- and *MYOGENIN*-positive nuclei were compared between *MYOD1*-UDCs and *MYOD1*-Fibs shown in figure A. Three pictures were randomly selected from *MYOD1*-UDCs and *MYOD1*-Fibs respectively. (C) qRT-PCR analysis of *MYOD1* (upper) and *MYOGENIN* (lower) expression levels relative to *EIF2B1*, an internal control, after differentiation;  $n = 3$ , for each. Data are expressed as mean  $\pm$  SEM. (D) Immunocytochemistry on *MYOD1*-UDCs after retroviral infection at various MOIs, 2 weeks after differentiation. Representative images are shown. Arrows show *MYOGENIN*-positive nuclei. MOI: multiplicity of infection. (E) The percentage of *MYOD1*- and *MYOGENIN*-positive nuclei were compared between *MYOD1*-UDCs infected at various MOIs shown in figure D. Three pictures were randomly selected from various MOIs respectively.

A

1  $\mu$ M

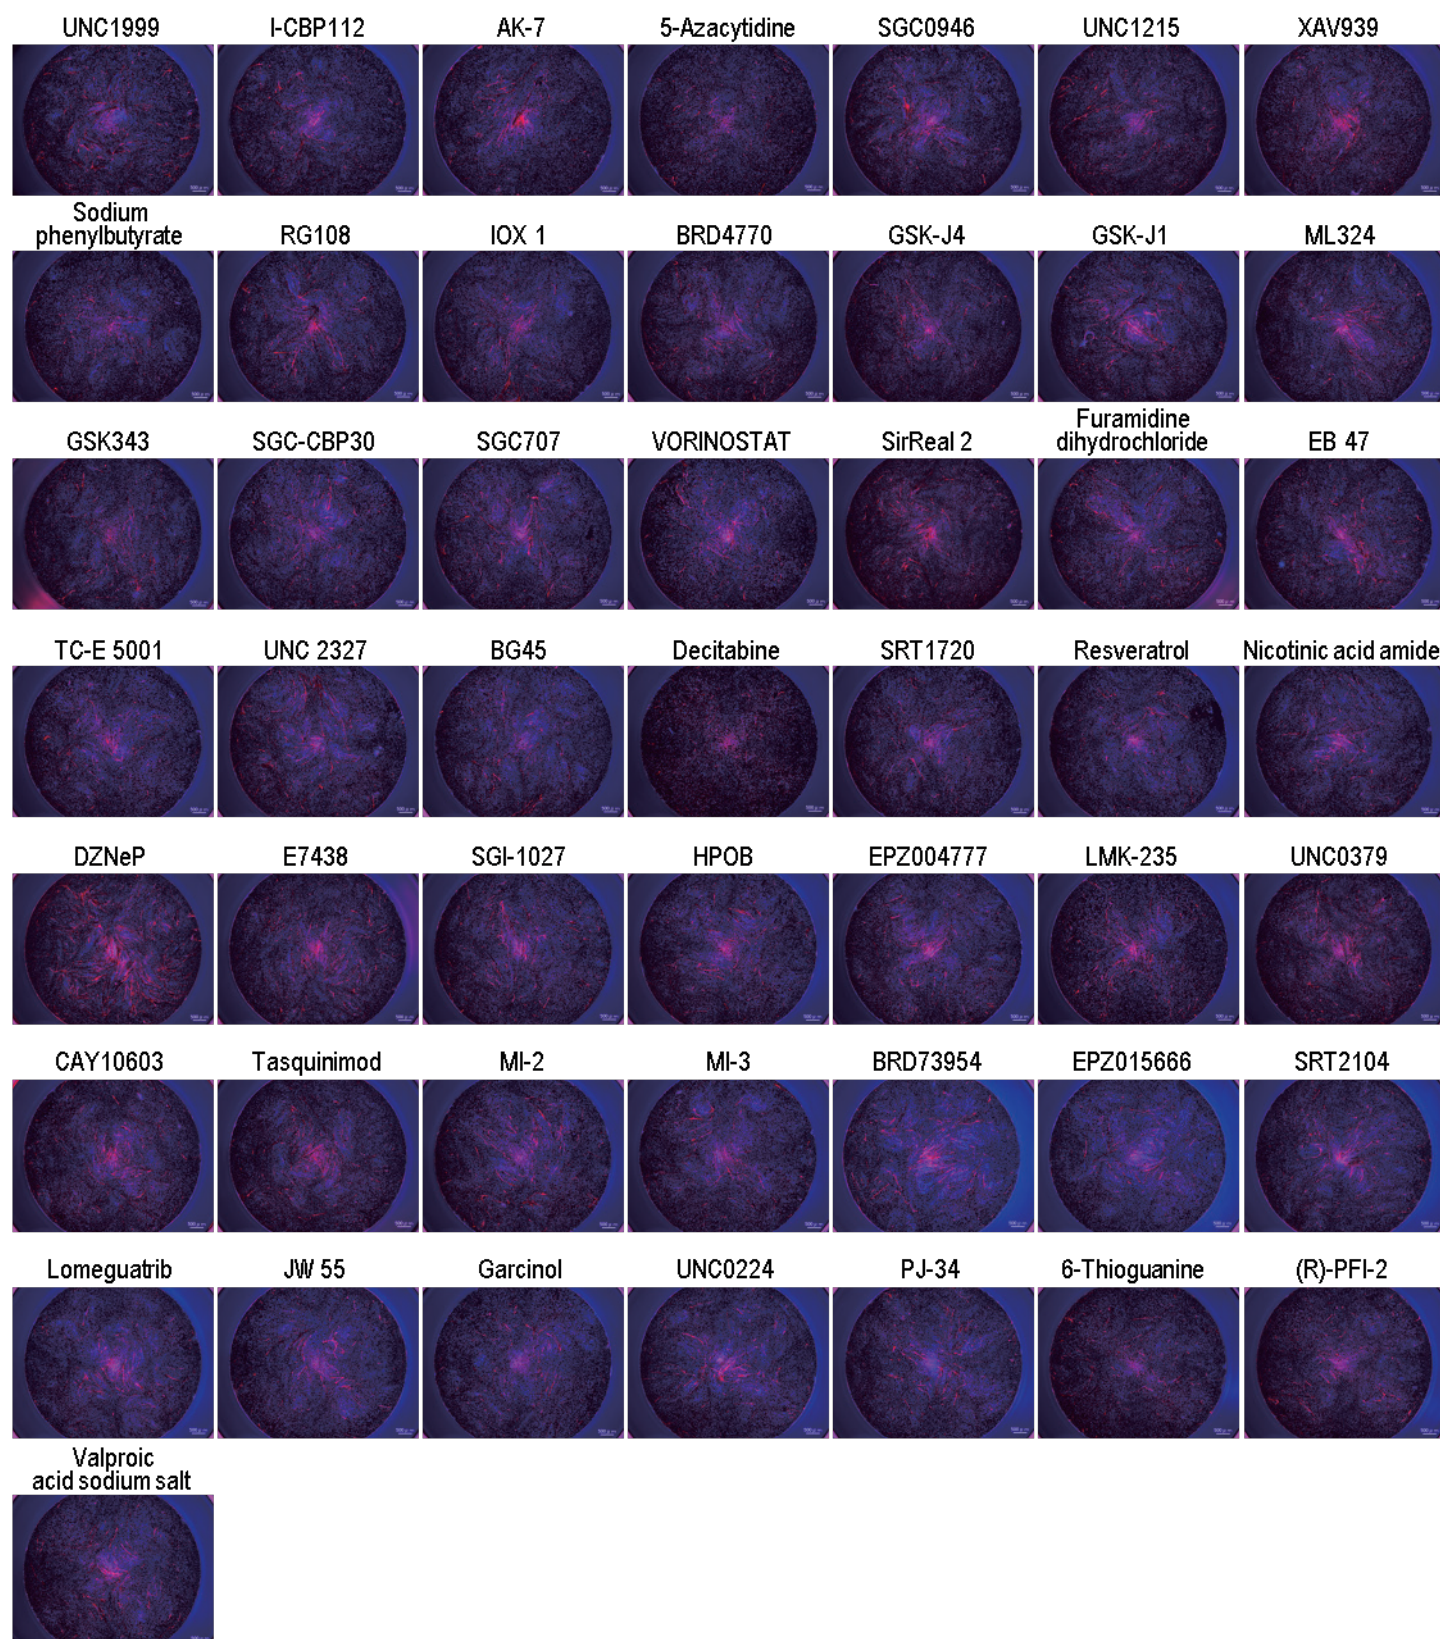

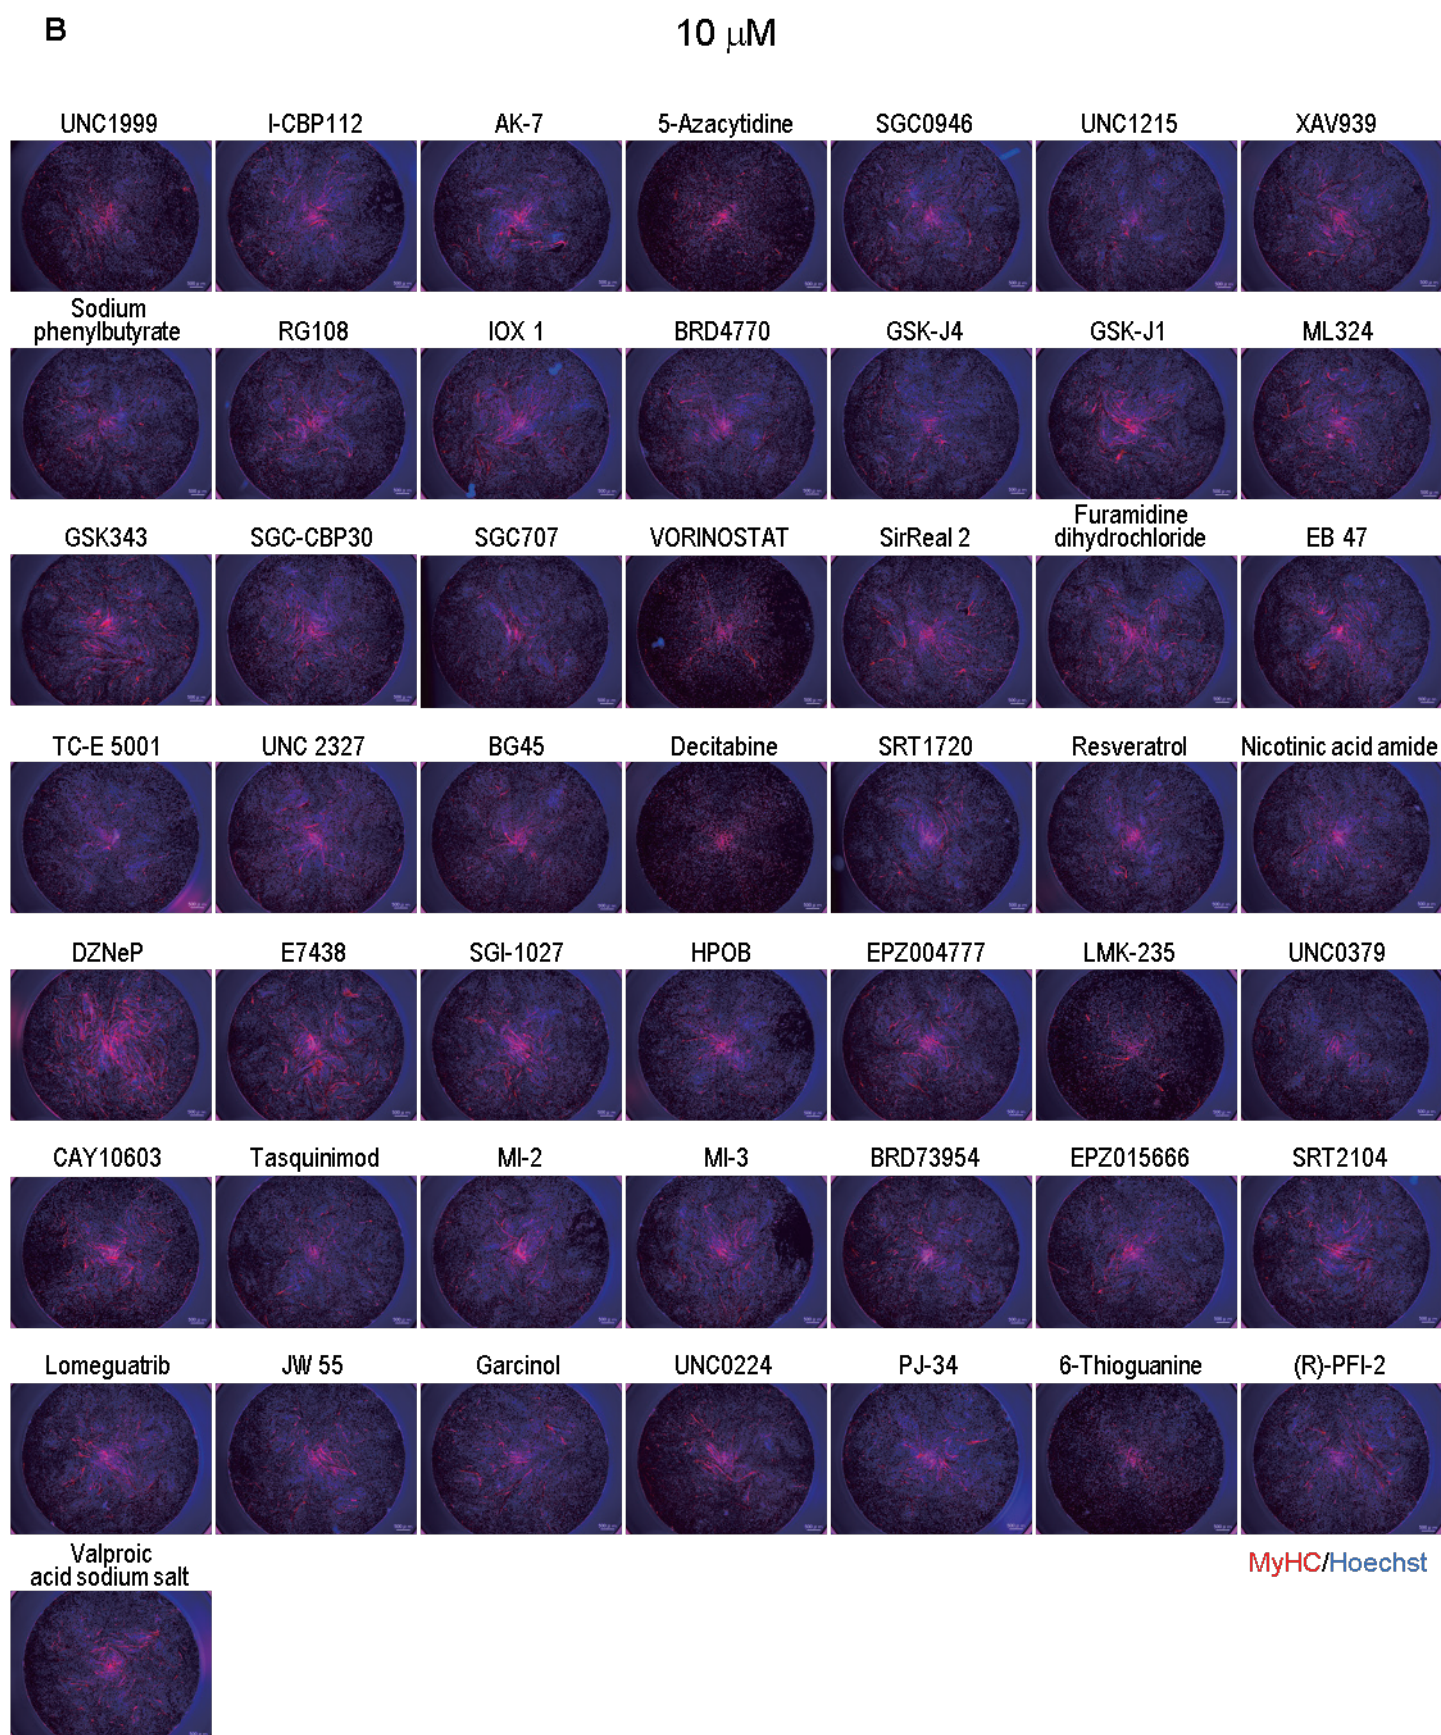

**Supplementary Figure S3. Screening of epigenetic drugs that promote myotube formation in *MYOD1*-converted urine-derived cells (UDCs).** Immunocytochemistry for myosin heavy chain (MyHC) on the 14<sup>th</sup> day after myogenic differentiation. Representative images are shown. *MYOD1*-transduced UDCs were treated with epigenetic drugs at 1  $\mu$ M (A) and 10  $\mu$ M (B) including 3-deazaneplanocin A hydrochloride (DZNeP, histone methyltransferase inhibitor) for initial 3 days after differentiation. Scale bar: 500  $\mu$ m.

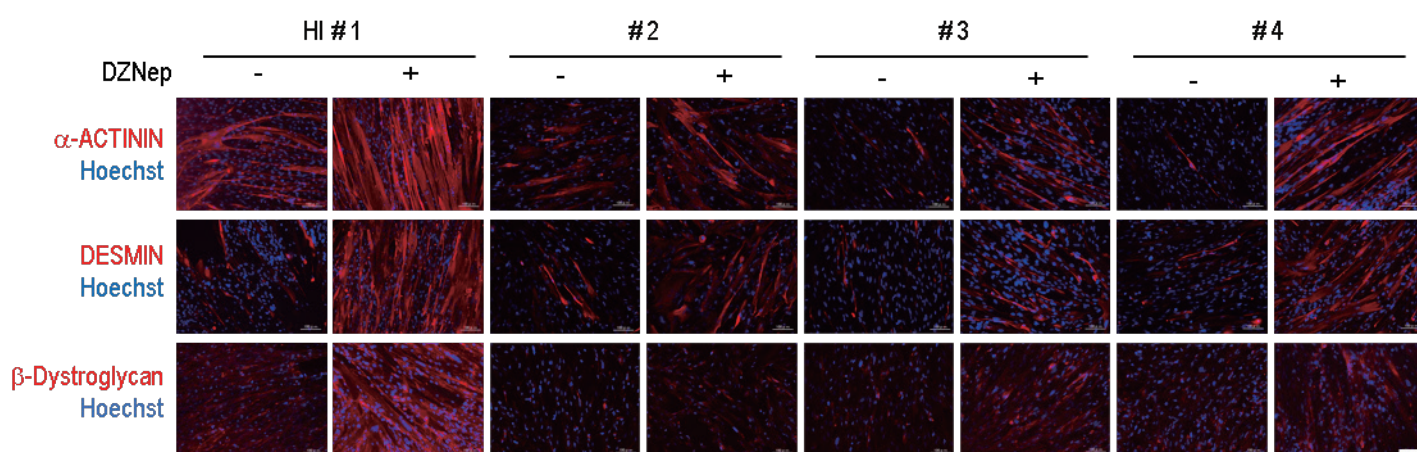

**Supplementary Figure S4. Successful myotube differentiation of 3-deazaneplanocin A hydrochloride (DZNep)-treated *MYOD1*-urine-derived cells (UDCs) derived from healthy individuals.** Representative images of immunocytochemistry for  $\alpha$ -ACTININ, DESMIN, and  $\beta$ -Dystroglycan in *MYOD1*-UDCs from healthy children and adults 14 days after differentiation. UDCs were treated with 1  $\mu$ M 3-deazaneplanocin A hydrochloride (DZNep) for initial 3 days after differentiation. HI: healthy individual. #1: 8-year-old male; #2: 13-year-old male; #3: 33-year-old male; #4: 38-year-old male. Scale bar: 100  $\mu$ m.

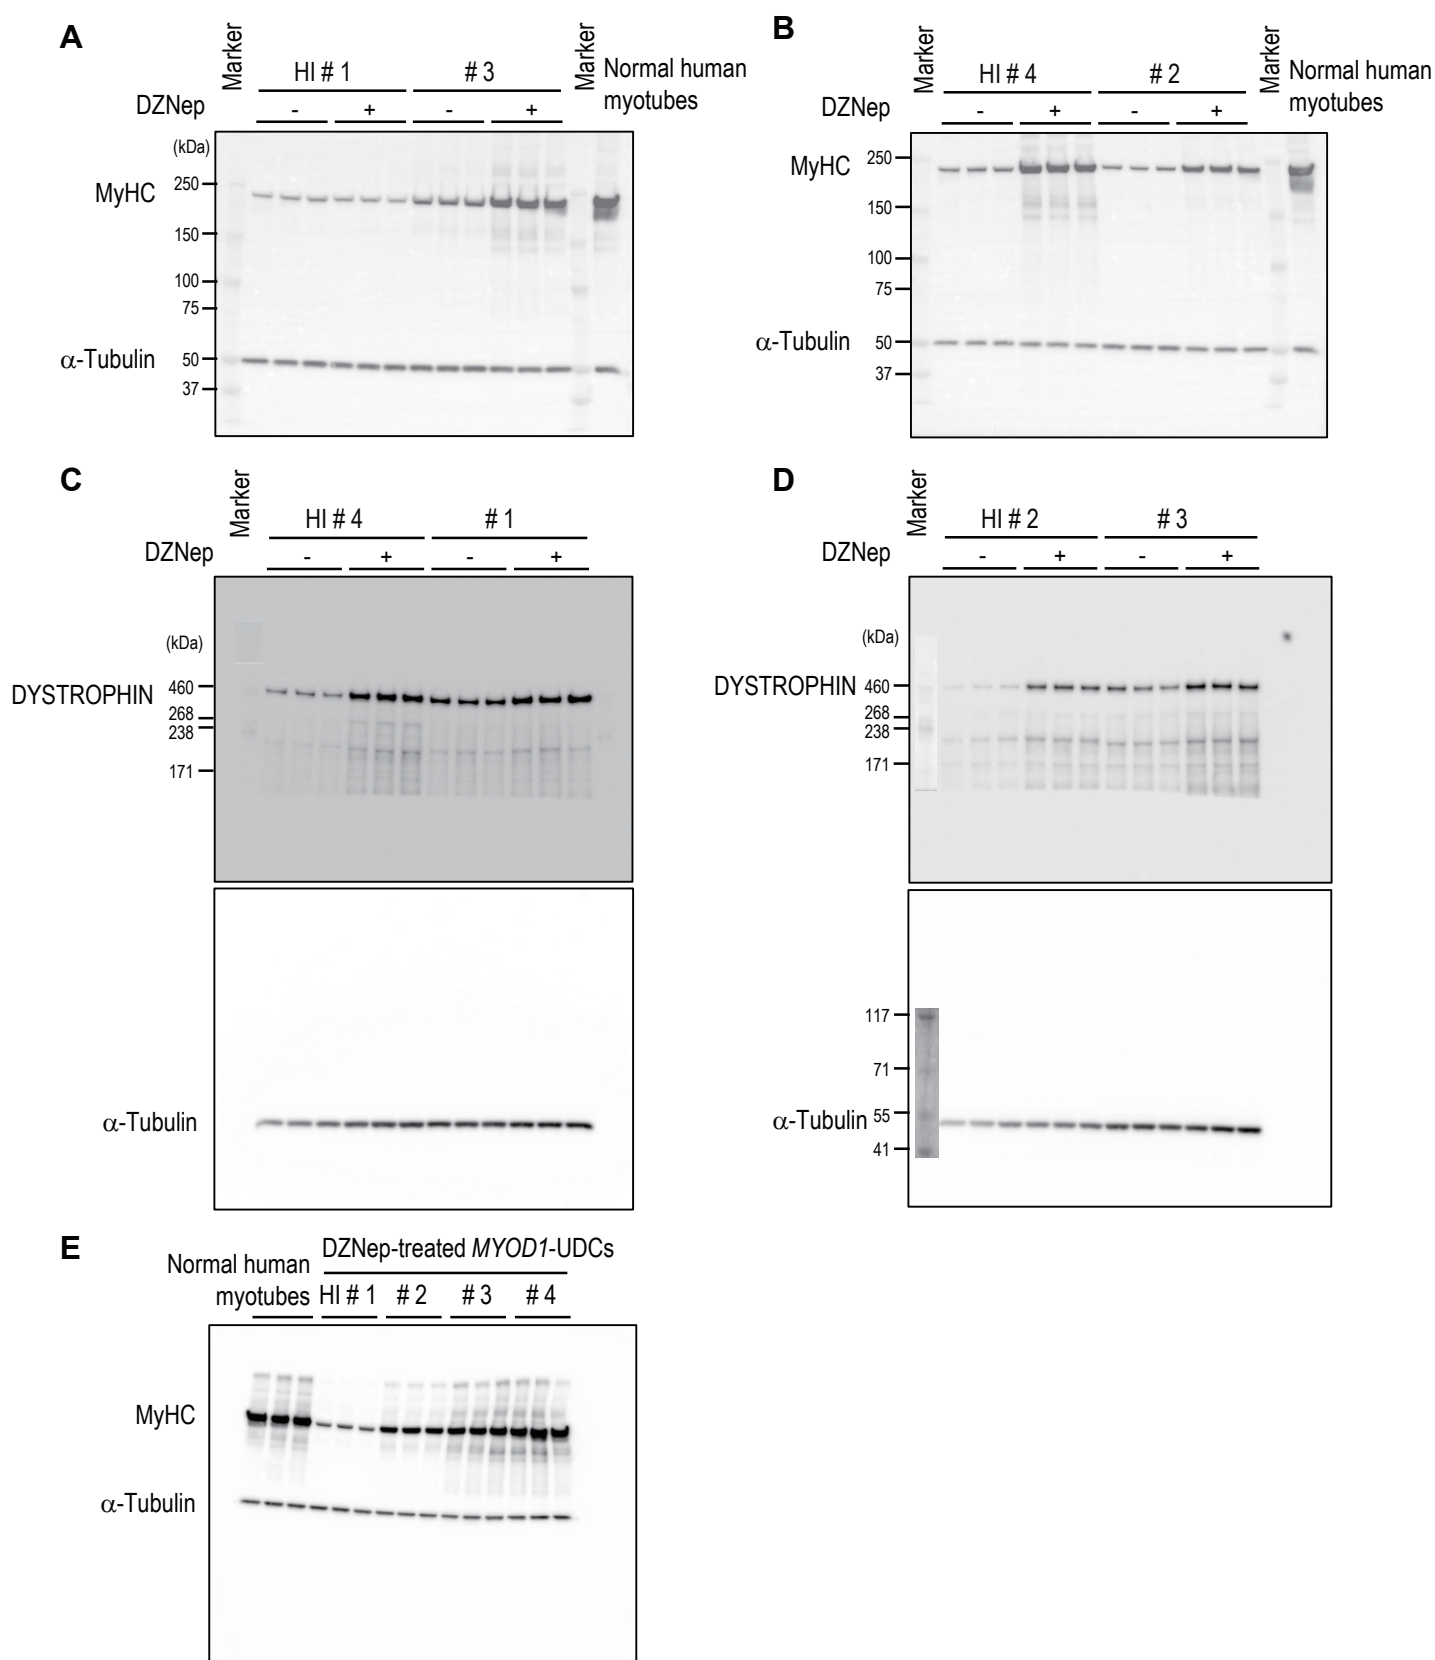

**Supplementary Figure S5. Immunoblotting analysis for MyHC and dystrophin using *MYOD1*-converted urine-derived cells (UDCs) from healthy individuals.** (A) (B) Images of whole membranes of MyHC staining. An anti- $\alpha$ -Tubulin antibody was used as a loading control. (C) (D) Images of whole membranes of dystrophin staining (upper) and  $\alpha$ -Tubulin (lower). (E) Immunoblotting analysis of MyHC in normal human myotubes (Lonza; CC-2580) and DZNep-treated *MYOD1*-UDCs. HI: healthy individual. #1: 8-year-old male; #2: 13-year-old male; #3: 33-year-old male; #4: 38-year-old male.

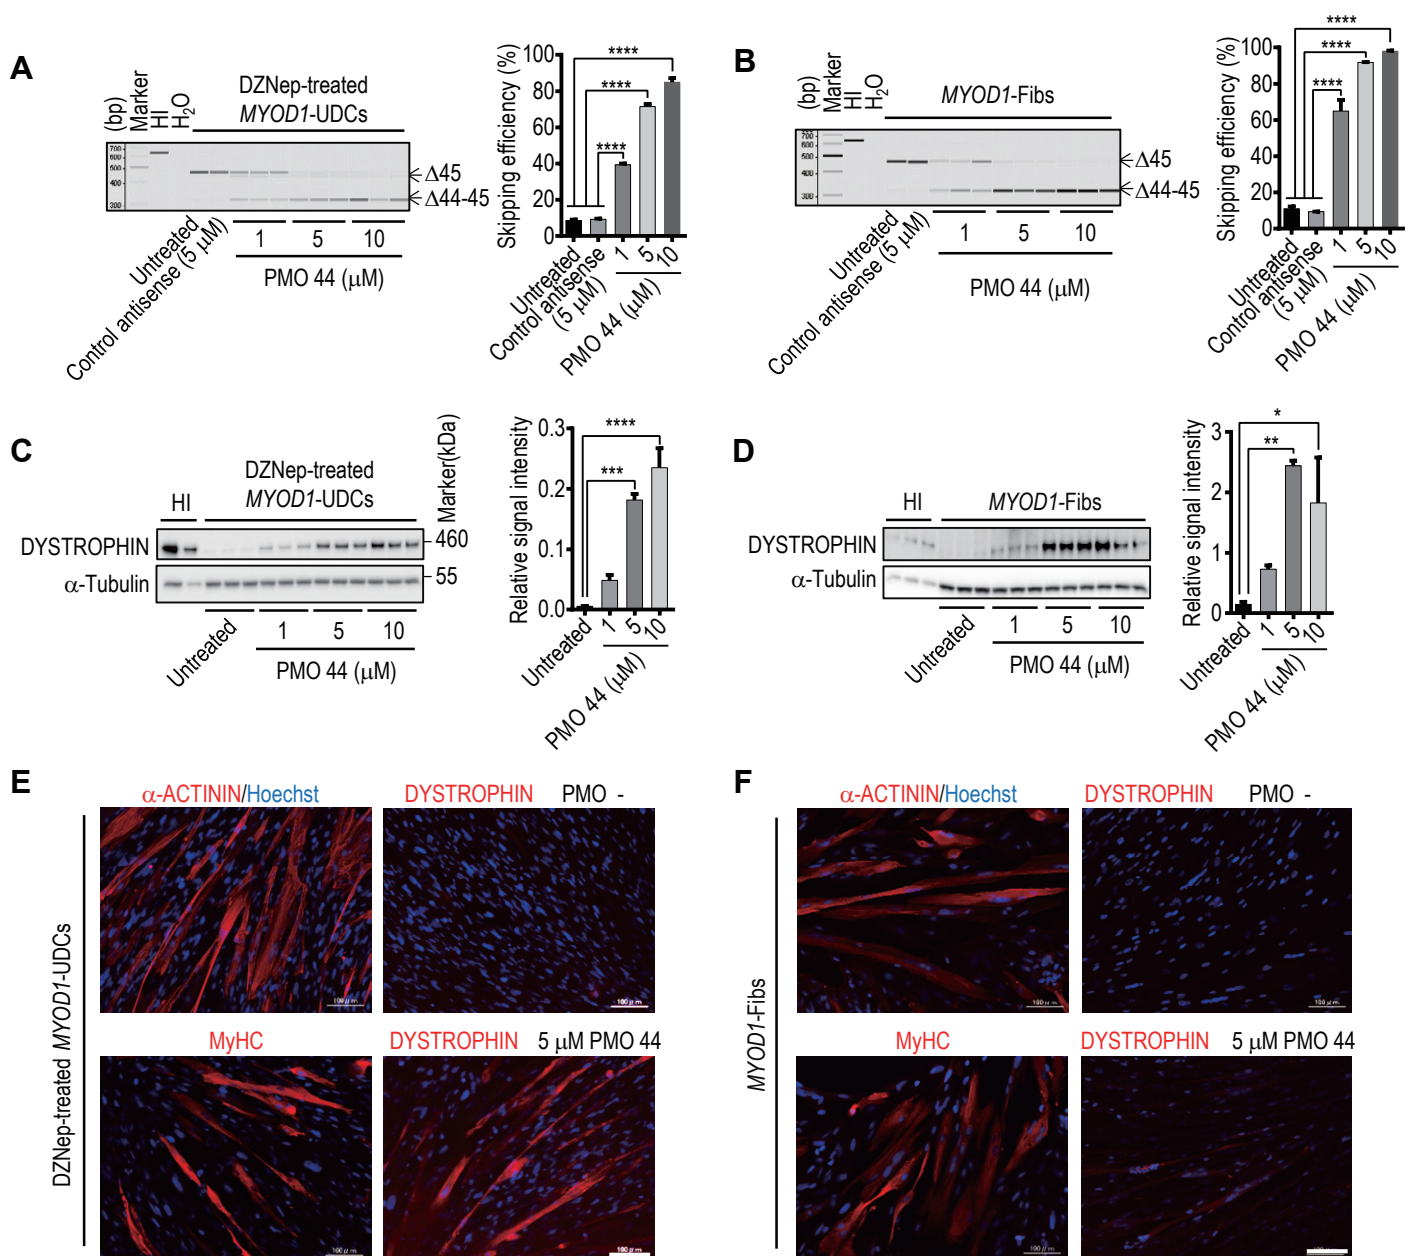

**Supplementary Figure S6. Detection of exon-skipping after phosphorodiamidate morpholino oligomer (PMO) treatment in *MYOD1*-urine-derived cells (UDCs) and *MYOD1*-Fibs derived from a Duchenne muscular dystrophy (DMD) patient with a deletion in exon 45.** (A, B) Quantification of exon-skipping after PMO treatment evaluated by RT-PCR in DZNep-treated *MYOD1*-UDCs and *MYOD1*-Fibs derived from a DMD patient with exon 45 deletion. The upper bands are unskipped products ( $\Delta 45$ ) that remained out of reading frame. The lower bands are exon 44-skipped products ( $\Delta 44-45$ ) that restored the open reading frame. Skipping efficiency was calculated as (exon 44-skipped transcript molarity) / (native + exon 44-skipped transcript molarity (marked with arrows))  $\times$  100% using MultiNA. One-way ANOVA followed by Bonferroni's post hoc test was used to compare the skipping efficiencies in patient-derived cells with and without PMO treatment. DZNep-treated *MYOD1*-UDCs and *MYOD1*-Fibs were also treated with control antisense at 5  $\mu$ M as controls;  $n = 3$ , for each. \*\*\*\* $P < 0.0001$ . Data are expressed as mean  $\pm$  SEM. HI: healthy individual. (C, D) Immunoblotting for dystrophin in DZNep-treated *MYOD1*-UDCs and *MYOD1*-Fibs from the DMD patient after PMO treatment. The relative intensities of the bands normalized to  $\alpha$ -Tubulin expression were compared in patient-derived cells with and without PMO treatment by performing a one-way ANOVA followed by a Bonferroni's post hoc test;  $n = 3$ , for each; \* $P < 0.05$ , \*\* $P < 0.01$ , \*\*\* $P < 0.001$ , \*\*\*\* $P < 0.0001$ . (E, F) Immunocytochemistry for  $\alpha$ -ACTININ, MyHC, and DYSTROPHIN in DZNep-treated *MYOD1*-UDCs and *MYOD1*-Fibs after PMO treatment. Representative pictures are shown. Scale bar: 100  $\mu$ m.

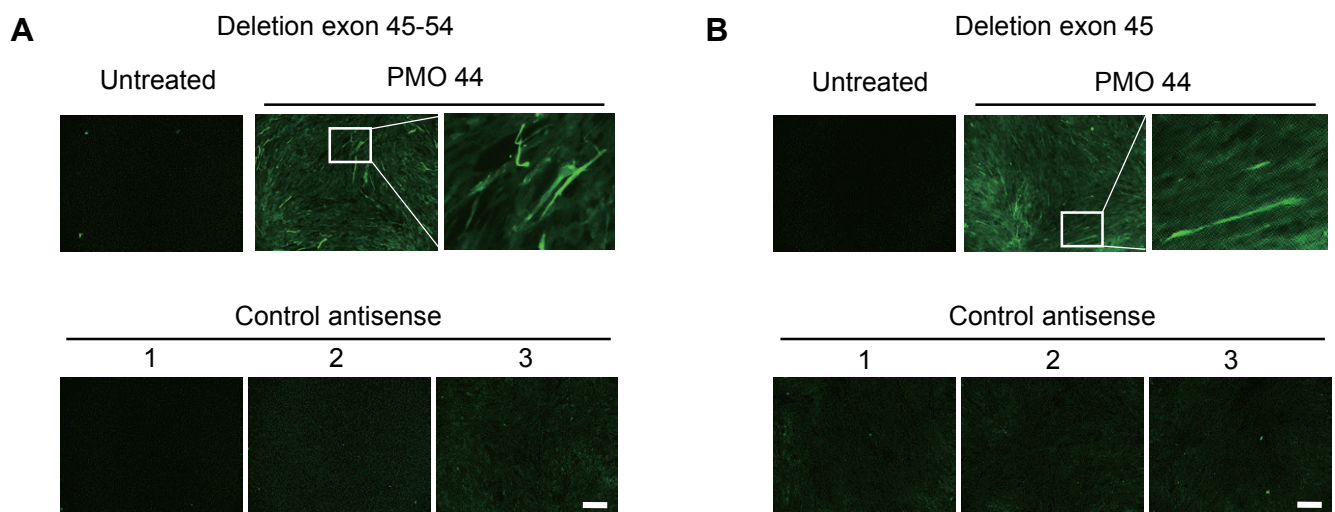

**Supplementary Figure S7. Highly efficient and specific screening using a fluorescent microscope.**

Representative images of immunocytochemistry for DYSTROPHIN (green; scale bar, 300  $\mu$ m) in 3-deazaneplanocin A hydrochloride (DZNep)-treated *MYOD1*-urine-derived cells (UDCs) from Duchenne muscular dystrophy (DMD) patients (A: patient with exon 45–54 deletion, B: deletion of exon 45, both of which were altered “in frame” by skipping exon 44. PMO44: PMO for skipping exon 44.

**Supplementary Table S1. Phosphorodiamidate morpholino oligomer (PMO) sequences and positions.**

| Target exon | Sequence (5' to 3')                | Position     | Length (bp) | Reference                                   |
|-------------|------------------------------------|--------------|-------------|---------------------------------------------|
| 44          | TG TTCAGCTTCTGTTAGCCACTGA          | H44 (+61+84) | 24          | Wilton, S. D. <i>et al. Mol Ther</i> , 2007 |
| 50          | AACTTCCTCTTTAACAGAAAAGCATA<br>C    | H50 (-19-8)  | 27          | Wu, B. <i>et al. PLoS One</i> , 2011        |
| 51          | CTCCAACATCAAGGAAGATGGCATTT<br>CTAG | H51 (+66-95) | 30          | Cirak, S. <i>et al. Lancet</i> , 2011       |
| 55          | TCTTCCAAAGCAGCCTCT                 | H55 (+13-30) | 18          | WO2004/048570                               |

**Supplementary Table S2. Antibodies used for FACS analysis.**

| <b>Primary antibody</b>             | <b>Source</b>     | <b>Dilution</b> |
|-------------------------------------|-------------------|-----------------|
| PE anti-human CD13                  | BioLegend; 344015 | 1:20            |
| FITC anti-human CD34                | BioLegend; 343603 | 1:20            |
| APC anti-human CD45                 | BioLegend; 368511 | 1:20            |
| FITC anti-human CD73                | BioLegend; 344015 | 1:20            |
| FITC anti-human CD90                | BioLegend; 328107 | 1:20            |
| APC anti-human CD105                | BioLegend; 323207 | 1:10            |
| PE Mouse IgG1, κ Isotype control    | BioLegend; 400111 | 1:20            |
| FITC Mouse IgG1, κ Isotype control  | BioLegend; 400109 | 1:20            |
| FITC Mouse IgG2a, κ Isotype control | BioLegend; 400207 | 1:20            |
| APC Mouse IgG1, κ Isotype control   | BioLegend; 400121 | 1:10            |

**Supplementary Table S3. RT-PCR primers.**

| <b>Gene</b>                    | <b>Forward primer (5' to 3')</b> | <b>Reverse primer (5' to 3')</b> | <b>Reference</b>                                    |
|--------------------------------|----------------------------------|----------------------------------|-----------------------------------------------------|
| $\gamma$ -Glutamyl transferase | TGAGCCCAGAAGTGAGAG<br>CAGTTG     | ATGTCCACCAGCTCAGAG<br>AGGGT      | Yamaguchi, S. et al. Scientific<br>reports,2016     |
| KSP-Cadherin 16                | CAAGTCATGAGGTGGTGG<br>TG         | TCATCTGTATCCTGGGCC<br>TC         | Thedieck, C., et al. Br J<br>Cancer, 2005           |
| Cytokeratin 8                  | GCCACTACTACACGACCA<br>TCC        | GAATCCACCTCCCACTG<br>ACC         | Lee, K. M. et al. Laboratory<br>investigation, 2005 |
| AQP1                           | TAACCCTGCTCGGTCCTT<br>TG         | AGTCGTAGATGAGTACAG<br>CCAG       | Yamaguchi, S. et al. Scientific<br>reports,2016     |

**Supplementary Table S4. TaqMan primers.**

| Gene            | TaqMan assay ID |
|-----------------|-----------------|
| <i>MYH2</i>     | Hs00430042_m1   |
| <i>DMD</i>      | Hs00758098_m1   |
| <i>EIF2B1</i>   | Hs00426752_m1   |
| <i>MYOGENIN</i> | Hs01072232_m1   |
| <i>MYOD1</i>    | Hs00159528_m1   |
